# Supplementary material for: A new class of thermo-switchable hydrogel: application to the host–guest approach
Source: Royal Society of Chemistry journal article supplement (doi:10.1039/c3ta13250a), 2013-01-01
Supplement: c3ta13250a.pdf [file c3ta13250a.pdf]

## Supporting Information

### 1. $^1\text{H}$ NMR spectrum of HMPAM/ $\alpha$ -CD

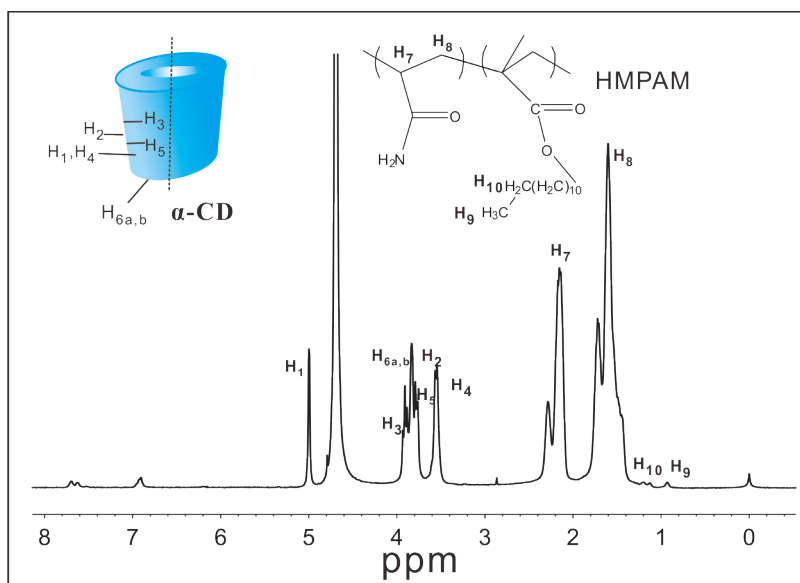

Figure S1  $^1\text{H}$  NMR spectra of 2.5wt%HMPAM /15mM  $\alpha$ -CD in  $\text{D}_2\text{O}$  at  $T = 25^\circ\text{C}$ .

### 2. Viscosity study of HMPAM/ $\alpha$ -CD solution

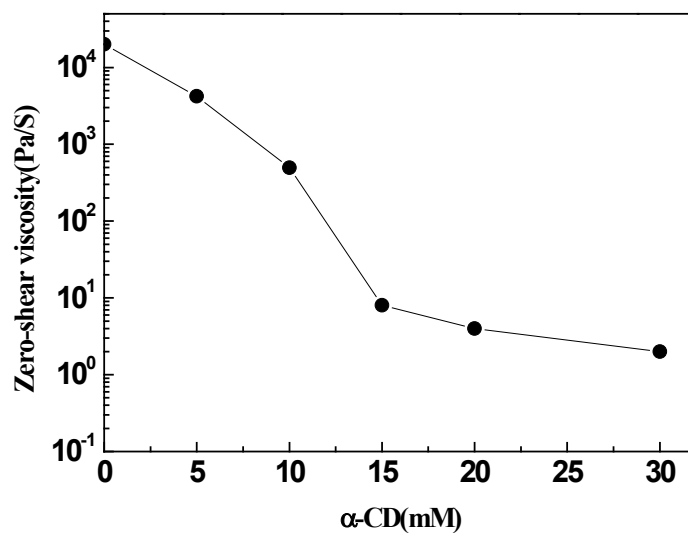

Figure S2. Zero-shear viscosity as a function of  $\alpha$ -CD for mixtures of P(AM/C<sub>12</sub>) and for mixtures of p(AM/C<sub>12</sub>) and  $\alpha$ -CD under an applied stress of 1.0 Pa. Polymer concentration = 2.5wt%.

### 3. Fluorescence study of HMPAM/PAM

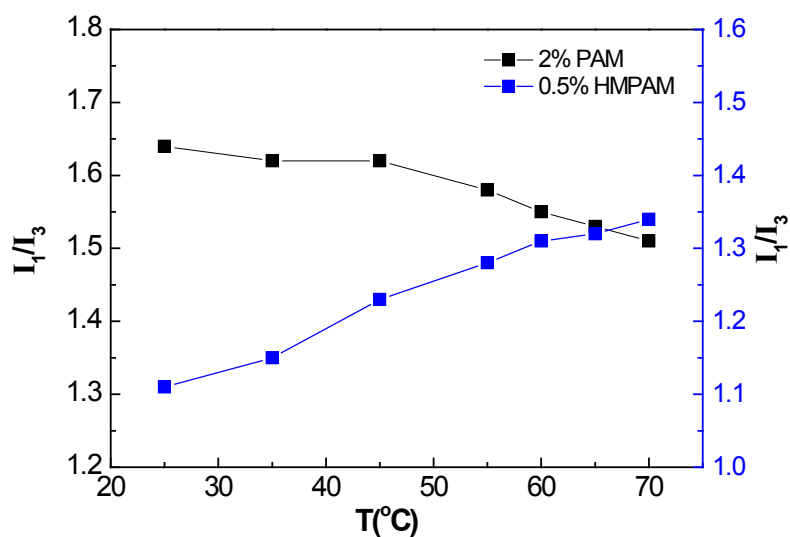

Figure S3 Variation of the ratio  $I_1/I_3$  of aqueous solutions of 0.5wt% HMAPM and 2.0wt%PAM with temperature between 25 $^{\circ}\text{C}$  and 70 $^{\circ}\text{C}$ .

#### 4. Rheology study of HMPAM/ $\alpha$ -CD

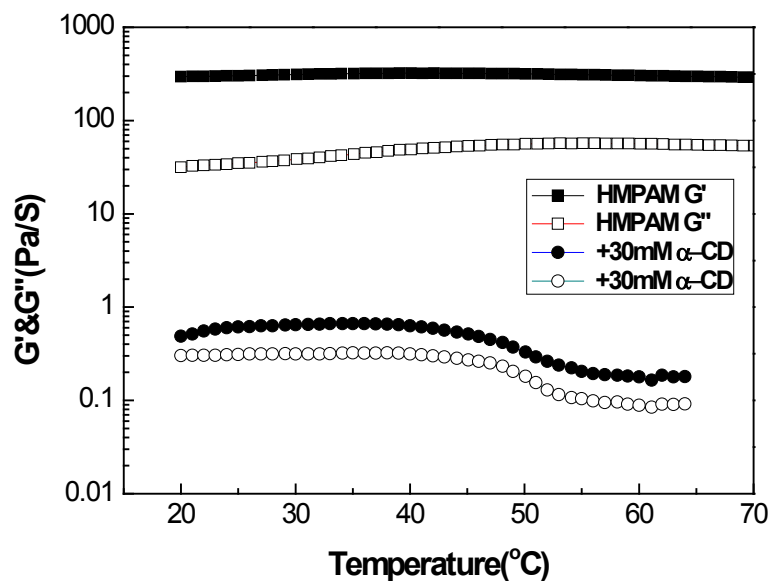

Figure S4 Storage modulus  $G'$  (filled circles) and loss modulus  $G''$  (empty circles) as a function of temperature for HMPAM/ $\alpha$ -CD solution. A shear strain amplitude of 3% and an angular frequency of 1 rad/s were applied. The concentration of polymer is set as 2.5wt%.

#### 5. The measurement of the association constants

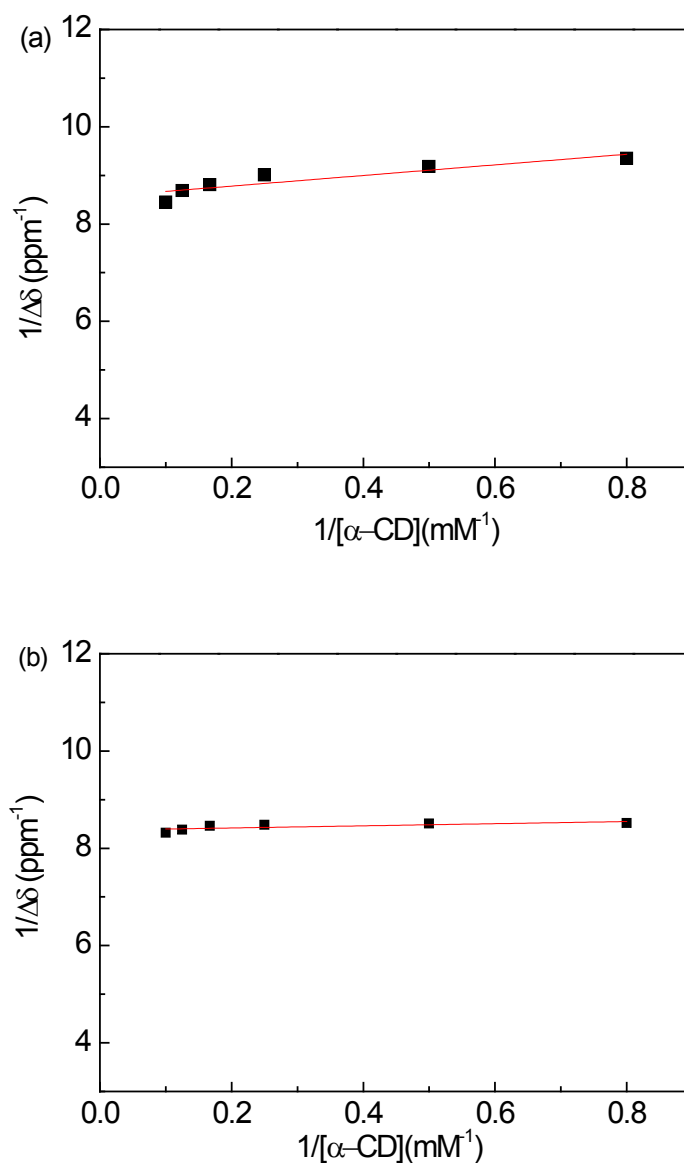

Figure S5 The Benesi-Hildebrand plots of the  $\alpha$ -CD/HMPAM system at 25°C(a) and 70°C(b). error, within  $\pm 10\%$ .

According to the method previously reported<sup>1-4</sup>, the determination of the association constants of the complex between the  $\alpha$ -CD and the HMPAM were carried out by measuring the difference between the chemical shifts of the HMPAM alone and the same guest with increasing the concentration of  $\alpha$ -CD. For the systems of 1:1 inclusion complex between guest and host, equilibrium constants ( $K_c$ ) were estimated by a modification of the Benesi-Hildebrand equation, using eq 2:

$$\frac{1}{\Delta Hz} = \frac{1}{K_c} \bullet \frac{1}{[R]_0 \delta} \bullet \frac{1}{[\beta - CD]} + \frac{1}{[R]_0 \delta}$$

The association constant can be calculated from the slope of the straight line obtained by plotting  $1/\Delta Hz$  vs  $1/[\alpha\text{-CD}]$ .

1. Harada, A.; Adachi, H.; Kawaguchi, Y.; Kamachi, M., *Macromolecules* **1997**, 30, (17), 5181-5182.
2. Tomatsu, I.; Hashidzume, A.; Harada, A., *Macromolecular Rapid Communications* **2005**, 26, (10), 825-829.
3. Taura, D.; Hashidzume, A.; Harada, A., *Macromolecular Rapid Communications* **2007**, 28, (24), 2306-2310.
4. Hashidzume, A.; Harada, A., *Polymer Chemistry* **2011**, 2, (10), 2146-2154.
